# Supplementary material for: Neuronal hyperactivity due to loss of inhibitory tone in APOE4 mice lacking Alzheimer’s disease-like pathology
Source: PubMed Central journal article supplement (PMC5684208; doi:10.1038/s41467-017-01444-0), 2017-11-13
Supplement: 41467_2017_1444_MOESM1_ESM.pdf [file 41467_2017_1444_MOESM1_ESM.pdf]

## SUPPLEMENTAL INFORMATION

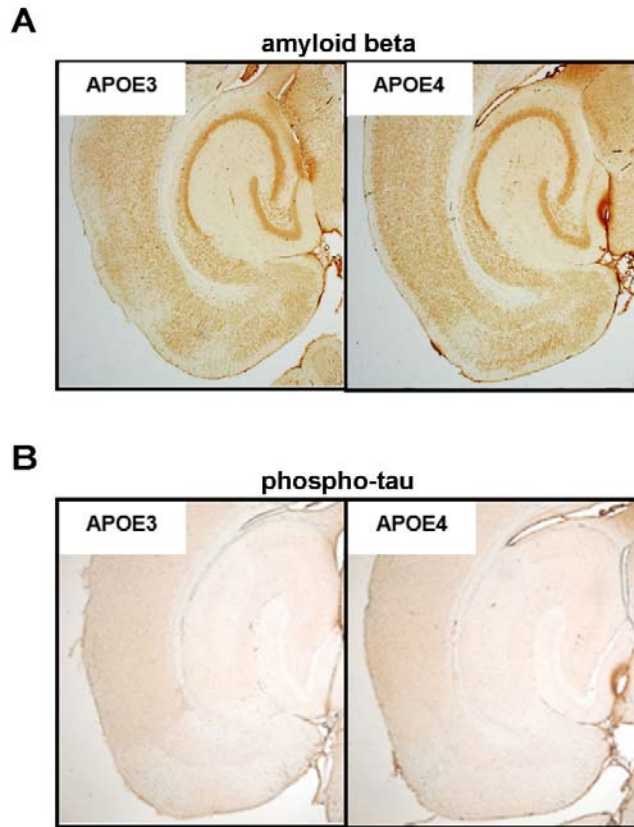

**Supplementary Fig. 1. *APOE* mice show no AD pathology.** Immunohistochemistry performed on brain sections from the *APOE* mice used during the fMRI study show no evidence of A $\beta$  or tau pathology. (A) A postmortem hippocampal section of a 20 month old *APOE3* mouse or 20 month old *APOE4* mouse labeled with an antibody recognizing mouse A $\beta$  (antibody 4G8) shows no histological evidence of amyloid pathology. (B) A postmortem hippocampal section of the same mice as A, labeled with an antibody recognizing phospho-tau (CP13), shows no histological evidence of tau pathology.

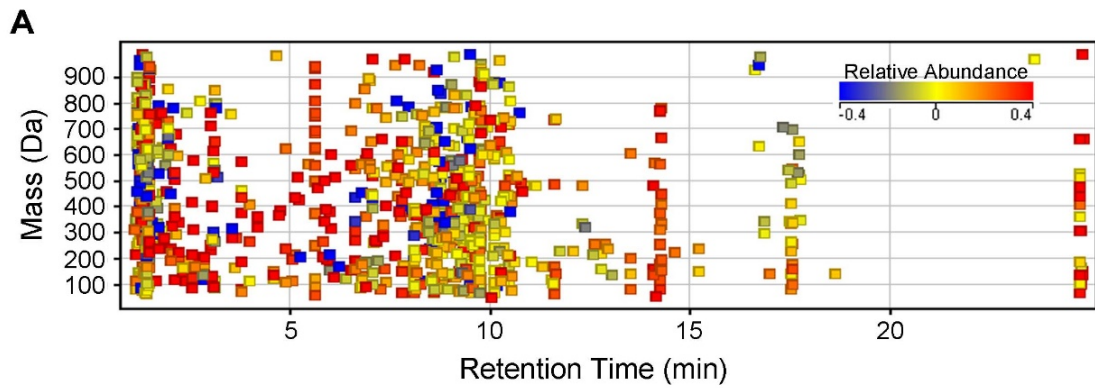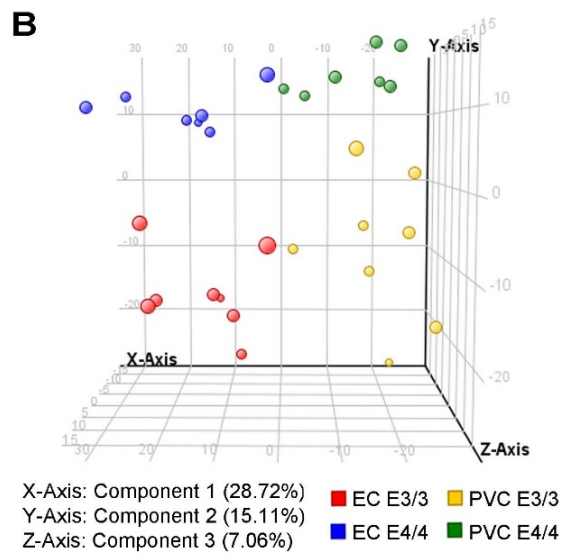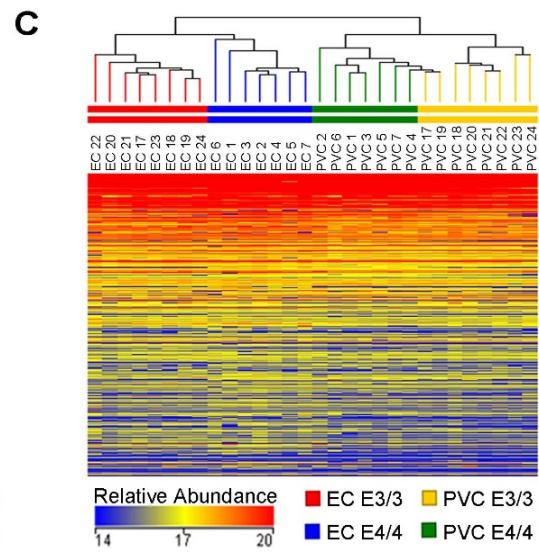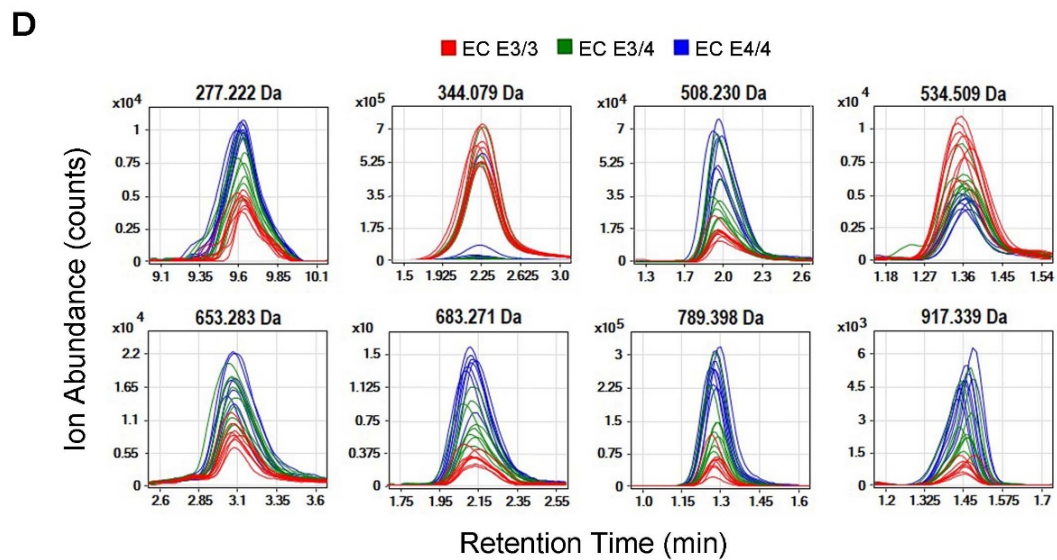

**Supplementary Fig. 2. Small-molecule expression reveals genotypic and regional differences in aged APOE mice.** Untargeted metabolite profiling was performed on small-molecule metabolites extracted from the EC and PVC of aged *APOE* mice (14-15 months old; 8 *APOE3/3*, 9 *APOE3/4* and 7 *APOE4/4* males). (A) A Mass vs. Retention Time plot depicting all ions discovered in positive ion detection mode using untargeted analysis. (B) Principle component analysis on untargeted metabolites discovered in positive ion detection mode. Each sphere represents a single sample. (C) Hierarchical clustering analysis on untargeted metabolites discovered in positive ion detection mode. Samples names are listed on top, with each line in the heat map representing the relative abundance of a single metabolite. (D) Chromatograms of eight metabolites detected in positive ion detection mode in the EC.

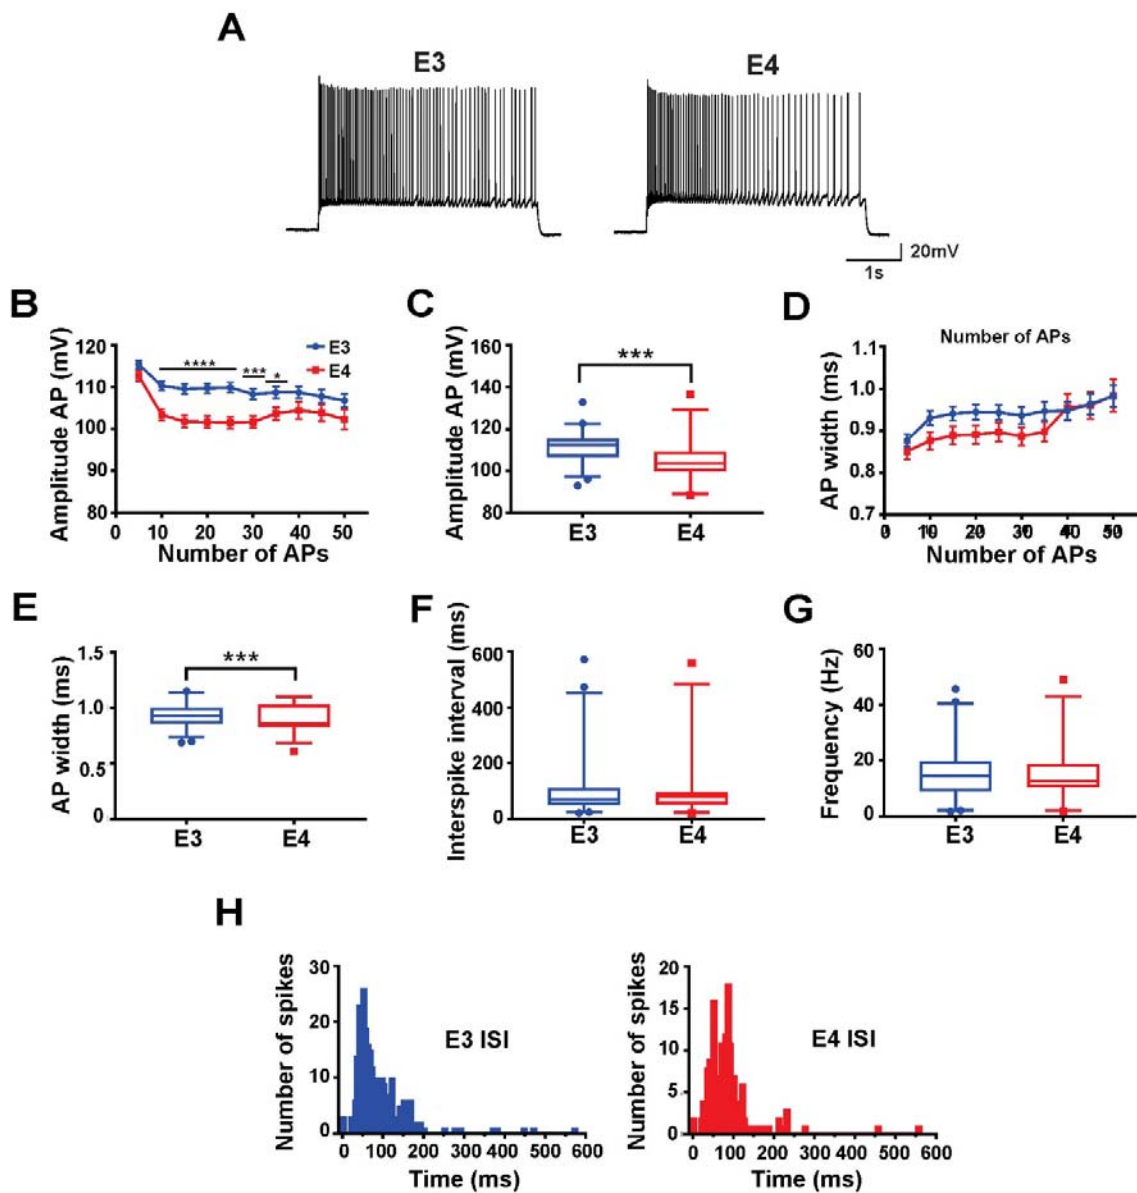

**Supplementary Fig. 3. *APOE4* expression is associated with decreased amplitude and width of action potentials in layer II EC pyramidal cells.** In vitro electrophysiology was performed using the patch-clamp whole-cell modality on pyramidal cells (n=6 cells per group) in the layer II EC of aged *APOE3* and *APOE4* mice (mean age = 20 months). (A) Representative traces of pyramidal neurons of *APOE3* and *APOE4* mice. Neurons were kept in current-clamp, and current was injected (0.3 nA, 4 s) in order to induce a train of action potentials (APs). (B) The amplitude of the AP was plotted after induction

of an AP train in *APOE3* and *APOE4* mice (\*\*\*\* $p < 0.001$ ; \*\*\* $p = 0.001$ ; \* $p = 0.015$ ). (C) Box plot bars showing (CI 1-99%) grouped AP amplitudes from B (ANOVA;  $F_{(1, 471)} = 88.784$ ,  $p < 0.001$ ). (D) AP width after induction of AP train. (E) Box-plot bars of AP width from *APOE3* and *APOE4* mice (ANOVA;  $F_{(1, 471)} = 19.777$ ,  $p < 0.001$ ). (F) Histograms of the interspike-interval (ISI) from *APOE3* (top) and *APOE4* (bottom). (G) Box-plot bars of frequencies of APs from layer II EC neurons from *APOE3* and *APOE4* mice (ANOVA;  $F_{(1, 460)} = 0.142$ ,  $p = 0.706$ ). (H) Box-plot bars of ISI of APs from layer II EC neurons from *APOE3* and *APOE4* mice (ANOVA;  $F_{(1, 460)} = 0.061$ ,  $p = 0.806$ ).

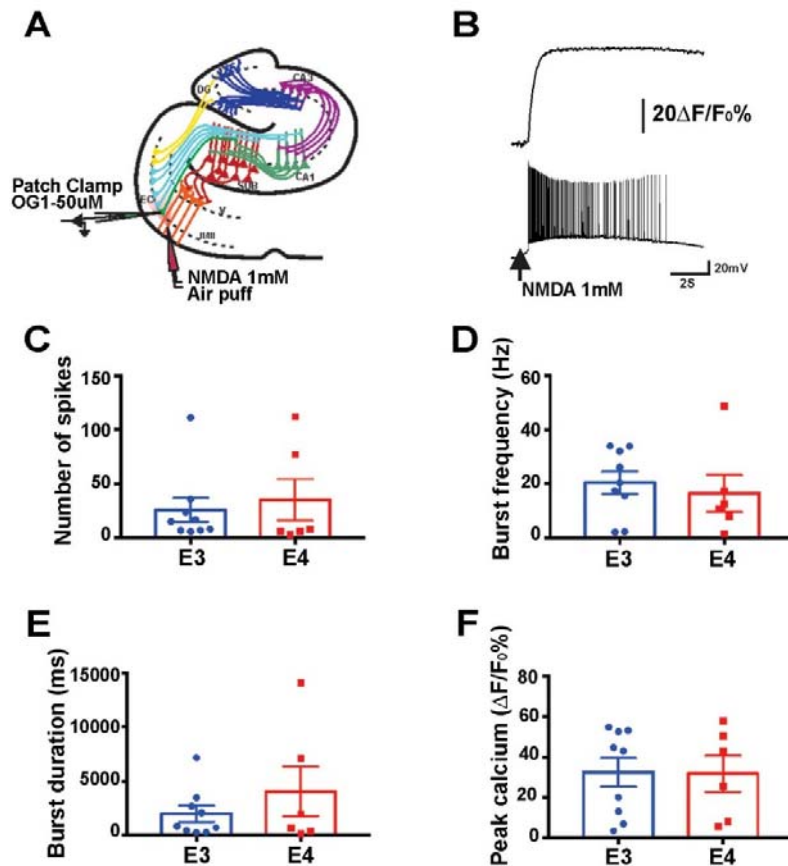

**Supplementary Fig. 4. *APOE4* expression is not associated with increased NMDA-receptor firing in EC layer II pyramidal cells.** NMDA-induced bursts were recorded using the patch-clamp whole-cell modality on pyramidal cells ( $n=6$  cells per group) in the layer II EC of aged *APOE3* and *APOE4* mice (mean age = 20 months). (A) Representation of the experiment design: a hippocampal horizontal slice is depicted with the principal neurons and projections in the different subregions. Layer II EC neurons were recorded with simultaneous calcium imaging (pipette solution contains, Oregon Green 1 BAPTA, 50  $\mu\text{M}$ ). A second glass pipette with NMDA (1mM) was placed close to the recording neuron, and an air-pressure system produced a quick release of NMDA (1 puff, 200 ms, 7 psi). (B) A representative trace of simultaneous current-clamp and calcium imaging recordings performed in layer II EC pyramidal neurons. **Top.** Changes in calcium fluorescence ( $\Delta F/F_0\%$ ) normalized to the baseline pre-stimulus. **Bottom.** Current-clamp trace after a stimulation with the NMDA pipette (arrow). (C) Number of spikes induced

after the stimulus with the NMDA pipette (ANOVA;  $F_{(1, 13)}=0.218$ ,  $p=0.649$ ). (D) Burst frequency of induced APs (ANOVA;  $F_{(1, 13)}=0.270$ ,  $p=0.612$ ). (E) Burst duration of induced APs (Welch ANOVA;  $F_{(1, 6.113)}=0.735$ ,  $p=0.424$ ). (F) Peak calcium (ANOVA;  $F_{(1, 13)}=0.003$ ,  $p=0.96$ ).

**Supplementary Table 1. Differentially expressed untargeted metabolites from the EC of APOE3 vs. E4 mice**

| <b>Mass (Da) @ Retention Time (min)</b> | <b>Regulation in E4/4</b> | <b>Fold Change</b> | <b>p-value</b> | <b>FDR</b> | <b>Detection Mode</b> |
|-----------------------------------------|---------------------------|--------------------|----------------|------------|-----------------------|
| 386.186@1.277                           | up                        | 3.25               | 0.001          | 0.012      | positive              |
| 191.151@9.700                           | up                        | 1.48               | 0.001          | 0.012      | positive              |
| 295.251@1.347                           | down                      | 1.31               | 0.001          | 0.012      | positive              |
| 403.209@1.277                           | up                        | 2.72               | 0.001          | 0.012      | positive              |
| 772.707@1.277                           | up                        | 3.55               | 0.001          | 0.012      | positive              |
| 279.254@1.379                           | down                      | 1.38               | 0.001          | 0.012      | positive              |
| 789.398@1.275                           | up                        | 6.27               | 0.001          | 0.012      | positive              |
| 173.140@9.690                           | up                        | 1.66               | 0.001          | 0.012      | positive              |
| 281.270@1.379                           | down                      | 1.55               | 0.001          | 0.012      | positive              |
| 681.437@1.328                           | up                        | 2.26               | 0.001          | 0.012      | positive              |
| 330.121@1.276                           | up                        | 2.78               | 0.001          | 0.012      | positive              |
| 667.456@1.355                           | up                        | 2.25               | 0.001          | 0.012      | positive              |
| 665.441@1.363                           | up                        | 2.43               | 0.001          | 0.012      | positive              |
| 297.264@1.344                           | down                      | 1.33               | 0.001          | 0.012      | positive              |
| 556.448@1.344                           | down                      | 1.28               | 0.001          | 0.012      | positive              |
| 387.356@1.276                           | up                        | 3.75               | 0.001          | 0.012      | positive              |
| 683.449@1.329                           | up                        | 2.05               | 0.001          | 0.012      | positive              |
| 97.088@9.700                            | up                        | 1.47               | 0.001          | 0.012      | positive              |
| 472.270@1.247                           | up                        | 6.65               | 0.001          | 0.012      | positive              |
| 472.280@1.211                           | down                      | 13.97              | 0.001          | 0.012      | positive              |
| 136.073@2.354                           | up                        | 4.07               | 0.001          | 0.012      | positive              |
| 508.230@2.083                           | up                        | 3.37               | 0.001          | 0.012      | positive              |
| 386.779@1.279                           | up                        | 3.85               | 0.001          | 0.012      | positive              |
| 467.184@1.436                           | up                        | 2.49               | 0.001          | 0.012      | positive              |
| 701.462@1.432                           | up                        | 4.04               | 0.001          | 0.012      | positive              |
| 200.046@5.028                           | up                        | 1.98               | 0.001          | 0.012      | positive              |
| 742.247@1.458                           | up                        | 1.87               | 0.001          | 0.012      | positive              |
| 536.526@1.393                           | down                      | 1.78               | 0.001          | 0.012      | positive              |
| 251.224@1.397                           | down                      | 1.24               | 0.001          | 0.012      | positive              |
| 900.685@1.443                           | up                        | 2.73               | 0.001          | 0.012      | positive              |
| 155.130@9.692                           | up                        | 1.63               | 0.001          | 0.012      | positive              |
| 640.135@10.140                          | up                        | 1.74               | 0.001          | 0.012      | positive              |
| 697.432@1.323                           | up                        | 2.25               | 0.001          | 0.012      | positive              |
| 180.019@1.418                           | up                        | 1.84               | 0.001          | 0.012      | positive              |
| 699.446@1.385                           | up                        | 2.89               | 0.001          | 0.012      | positive              |



|               |      |       |       |       |          |
|---------------|------|-------|-------|-------|----------|
| 574.210@9.700 | up   | 1.68  | 0.001 | 0.012 | positive |
| 269.238@1.355 | down | 1.41  | 0.001 | 0.012 | positive |
| 580.217@1.283 | up   | 2.48  | 0.001 | 0.012 | positive |
| 667.457@1.355 | up   | 2.25  | 0.001 | 0.012 | positive |
| 574.318@9.703 | up   | 1.66  | 0.001 | 0.012 | positive |
| 900.690@1.443 | up   | 2.40  | 0.001 | 0.012 | positive |
| 772.944@1.276 | up   | 12.77 | 0.001 | 0.012 | positive |
| 506.475@1.386 | down | 1.54  | 0.001 | 0.012 | positive |
| 118.063@2.355 | up   | 3.65  | 0.001 | 0.012 | positive |
| 403.206@1.539 | up   | 4.48  | 0.001 | 0.012 | positive |
| 653.402@1.344 | up   | 3.62  | 0.001 | 0.012 | positive |
| 262.227@1.379 | down | 1.35  | 0.001 | 0.012 | positive |
| 403.381@1.274 | up   | 3.49  | 0.001 | 0.012 | positive |
| 80.062@1.379  | down | 1.29  | 0.001 | 0.012 | positive |
| 789.631@1.270 | up   | 9.38  | 0.001 | 0.012 | positive |
| 261.192@9.629 | up   | 1.35  | 0.001 | 0.012 | positive |
| 794.355@1.275 | up   | 5.83  | 0.001 | 0.012 | positive |
| 246.221@9.299 | up   | 1.87  | 0.001 | 0.012 | positive |
| 683.271@2.120 | up   | 5.47  | 0.001 | 0.012 | positive |
| 560.518@1.380 | down | 1.97  | 0.001 | 0.012 | positive |
| 695.423@1.342 | up   | 2.59  | 0.001 | 0.012 | positive |
| 710.620@1.386 | down | 1.70  | 0.001 | 0.012 | positive |
| 776.853@1.271 | up   | 4.02  | 0.001 | 0.012 | positive |
| 655.428@1.334 | up   | 2.08  | 0.001 | 0.012 | positive |
| 990.823@1.282 | up   | 2.22  | 0.001 | 0.012 | positive |
| 990.829@1.282 | up   | 2.56  | 0.001 | 0.012 | positive |
| 576.823@9.699 | up   | 1.58  | 0.001 | 0.012 | positive |
| 277.222@9.631 | up   | 2.85  | 0.001 | 0.012 | positive |
| 889.205@1.346 | down | 1.43  | 0.001 | 0.012 | positive |
| 566.508@1.426 | down | 1.43  | 0.001 | 0.012 | positive |
| 886.688@1.341 | down | 1.45  | 0.001 | 0.012 | positive |
| 854.355@1.441 | up   | 8.56  | 0.001 | 0.012 | positive |
| 858.465@1.285 | up   | 10.13 | 0.001 | 0.012 | positive |
| 265.227@1.385 | down | 1.60  | 0.001 | 0.012 | positive |
| 519.763@9.689 | up   | 1.79  | 0.001 | 0.012 | positive |
| 120.089@1.368 | down | 1.22  | 0.001 | 0.012 | positive |
| 544.316@1.208 | up   | 2.43  | 0.001 | 0.012 | positive |
| 333.213@1.354 | down | 3.14  | 0.001 | 0.012 | positive |
| 266.206@9.705 | up   | 3.73  | 0.001 | 0.012 | positive |
| 307.198@9.729 | up   | 1.72  | 0.001 | 0.012 | positive |
| 637.414@1.375 | up   | 3.77  | 0.001 | 0.012 | positive |

|               |      |       |       |       |          |
|---------------|------|-------|-------|-------|----------|
| 636.165@1.273 | up   | 2.33  | 0.001 | 0.012 | positive |
| 774.084@1.278 | up   | 6.45  | 0.001 | 0.012 | positive |
| 508.493@1.369 | down | 2.16  | 0.001 | 0.012 | positive |
| 534.509@1.370 | down | 2.18  | 0.001 | 0.012 | positive |
| 241.213@1.375 | down | 1.64  | 0.001 | 0.012 | positive |
| 655.422@1.333 | up   | 2.05  | 0.001 | 0.012 | positive |
| 323.273@1.334 | down | 1.74  | 0.001 | 0.012 | positive |
| 533.252@1.445 | up   | 8.86  | 0.001 | 0.012 | positive |
| 917.339@1.443 | up   | 6.10  | 0.001 | 0.012 | positive |
| 789.735@1.279 | up   | 17.67 | 0.001 | 0.012 | positive |
| 629.372@1.971 | up   | 9.18  | 0.001 | 0.012 | positive |
| 576.958@9.702 | up   | 1.63  | 0.001 | 0.012 | positive |
| 274.063@1.281 | up   | 2.84  | 0.001 | 0.012 | positive |
| 667.675@1.356 | up   | 2.72  | 0.001 | 0.012 | positive |
| 731.430@1.422 | up   | 2.26  | 0.001 | 0.012 | positive |
| 677.407@1.334 | up   | 2.66  | 0.001 | 0.012 | positive |
| 713.422@1.350 | up   | 2.26  | 0.001 | 0.012 | positive |
| 729.425@1.402 | up   | 2.67  | 0.001 | 0.012 | positive |
| 316.093@2.535 | up   | 3.74  | 0.001 | 0.012 | positive |
| 562.939@1.379 | down | 1.78  | 0.001 | 0.012 | positive |
| 660.673@1.274 | up   | 8.95  | 0.001 | 0.012 | positive |
| 442.254@1.200 | up   | 5.47  | 0.001 | 0.012 | positive |
| 807.153@1.274 | up   | 2.96  | 0.001 | 0.012 | positive |
| 183.155@1.382 | down | 1.90  | 0.001 | 0.012 | positive |
| 934.369@1.435 | up   | 2.23  | 0.001 | 0.012 | positive |
| 681.748@1.321 | up   | 2.71  | 0.001 | 0.012 | positive |
| 657.447@1.374 | up   | 3.02  | 0.001 | 0.012 | positive |
| 797.387@1.282 | up   | 14.72 | 0.001 | 0.012 | positive |
| 731.437@1.422 | up   | 2.14  | 0.001 | 0.012 | positive |
| 403.447@1.275 | up   | 4.17  | 0.001 | 0.012 | positive |
| 627.413@1.356 | up   | 5.36  | 0.001 | 0.012 | positive |
| 429.395@7.778 | up   | 2.58  | 0.001 | 0.012 | positive |
| 684.237@1.451 | up   | 2.08  | 0.001 | 0.012 | positive |
| 627.415@1.363 | up   | 4.08  | 0.001 | 0.012 | positive |
| 485.278@9.312 | up   | 1.86  | 0.001 | 0.012 | positive |
| 807.152@1.274 | up   | 3.31  | 0.001 | 0.012 | positive |
| 700.137@1.418 | up   | 1.80  | 0.001 | 0.012 | positive |
| 229.233@8.620 | up   | 1.24  | 0.001 | 0.012 | positive |
| 178.166@1.379 | down | 1.70  | 0.001 | 0.012 | positive |
| 385.281@1.410 | down | 1.56  | 0.001 | 0.012 | positive |
| 422.163@1.266 | up   | 3.10  | 0.001 | 0.012 | negative |

|                |      |      |       |       |          |
|----------------|------|------|-------|-------|----------|
| 424.161@1.266  | up   | 3.19 | 0.001 | 0.012 | negative |
| 446.206@1.268  | up   | 4.25 | 0.001 | 0.012 | negative |
| 200.044@5.046  | up   | 1.62 | 0.001 | 0.012 | negative |
| 450.158@1.415  | up   | 2.17 | 0.001 | 0.012 | negative |
| 492.135@5.046  | up   | 1.66 | 0.001 | 0.012 | negative |
| 742.247@1.458  | up   | 1.86 | 0.001 | 0.012 | negative |
| 424.336@1.266  | up   | 4.37 | 0.001 | 0.012 | negative |
| 449.181@1.261  | up   | 3.08 | 0.001 | 0.012 | negative |
| 404.196@1.422  | up   | 4.10 | 0.001 | 0.012 | negative |
| 264.014@7.119  | up   | 1.81 | 0.001 | 0.012 | negative |
| 446.206@1.262  | up   | 4.48 | 0.001 | 0.012 | negative |
| 191.916@5.047  | up   | 1.59 | 0.001 | 0.012 | negative |
| 422.783@1.268  | up   | 5.40 | 0.001 | 0.012 | negative |
| 334.046@10.373 | up   | 4.27 | 0.001 | 0.012 | negative |
| 200.168@5.048  | up   | 1.66 | 0.001 | 0.012 | negative |
| 514.093@1.270  | up   | 2.60 | 0.001 | 0.012 | negative |
| 450.338@1.416  | up   | 2.55 | 0.001 | 0.012 | negative |
| 286.119@4.311  | up   | 4.87 | 0.001 | 0.012 | negative |
| 416.028@10.351 | up   | 4.10 | 0.001 | 0.012 | negative |
| 333.238@1.351  | down | 1.44 | 0.001 | 0.012 | negative |
| 200.044@7.119  | up   | 1.56 | 0.001 | 0.012 | negative |
| 374.073@10.325 | up   | 4.61 | 0.001 | 0.012 | negative |
| 356.174@1.269  | up   | 2.62 | 0.001 | 0.012 | negative |
| 424.780@1.260  | up   | 5.60 | 0.001 | 0.012 | negative |
| 331.228@1.331  | down | 1.42 | 0.001 | 0.012 | negative |
| 434.038@10.351 | up   | 4.78 | 0.001 | 0.012 | negative |
| 374.010@5.049  | up   | 1.50 | 0.001 | 0.012 | negative |
| 850.822@1.268  | up   | 5.98 | 0.001 | 0.012 | negative |
| 696.289@1.450  | up   | 4.71 | 0.001 | 0.012 | negative |
| 556.106@7.113  | up   | 1.81 | 0.001 | 0.012 | negative |
| 341.995@7.123  | up   | 1.61 | 0.001 | 0.012 | negative |
| 235.997@2.353  | up   | 5.60 | 0.001 | 0.012 | negative |
| 426.167@1.265  | up   | 3.36 | 0.001 | 0.012 | negative |
| 349.234@1.379  | down | 1.25 | 0.001 | 0.012 | negative |
| 468.169@4.330  | up   | 2.16 | 0.001 | 0.012 | negative |
| 196.090@2.343  | up   | 4.98 | 0.001 | 0.012 | negative |
| 450.410@1.416  | up   | 3.20 | 0.001 | 0.012 | negative |
| 191.917@7.124  | up   | 1.74 | 0.001 | 0.012 | negative |
| 318.104@6.006  | up   | 2.97 | 0.001 | 0.012 | negative |
| 386.186@1.269  | up   | 3.57 | 0.001 | 0.012 | negative |
| 304.018@5.064  | up   | 1.36 | 0.001 | 0.012 | negative |

|                |    |       |       |       |          |
|----------------|----|-------|-------|-------|----------|
| 432.198@1.265  | up | 10.65 | 0.001 | 0.012 | negative |
| 512.185@1.267  | up | 1.62  | 0.001 | 0.012 | negative |
| 254.132@1.229  | up | 1.94  | 0.001 | 0.012 | negative |
| 614.181@1.414  | up | 2.04  | 0.001 | 0.012 | negative |
| 610.197@6.008  | up | 7.45  | 0.001 | 0.012 | negative |
| 578.207@4.303  | up | 7.30  | 0.001 | 0.012 | negative |
| 742.476@1.460  | up | 2.04  | 0.001 | 0.012 | negative |
| 500.121@5.060  | up | 1.46  | 0.001 | 0.012 | negative |
| 594.088@4.925  | up | 1.96  | 0.001 | 0.012 | negative |
| 596.221@1.432  | up | 4.26  | 0.001 | 0.012 | negative |
| 490.203@1.294  | up | 5.00  | 0.001 | 0.012 | negative |
| 596.108@5.056  | up | 1.61  | 0.001 | 0.012 | negative |
| 586.201@1.249  | up | 2.04  | 0.001 | 0.012 | negative |
| 898.728@1.261  | up | 3.62  | 0.001 | 0.012 | negative |
| 218.013@2.383  | up | 1.89  | 0.001 | 0.012 | negative |
| 492.135@5.042  | up | 1.68  | 0.001 | 0.012 | negative |
| 336.074@4.992  | up | 2.22  | 0.001 | 0.012 | negative |
| 666.219@7.821  | up | 2.22  | 0.001 | 0.012 | negative |
| 614.182@1.414  | up | 2.03  | 0.001 | 0.012 | negative |
| 388.099@5.039  | up | 1.49  | 0.001 | 0.012 | negative |
| 382.075@7.279  | up | 2.29  | 0.001 | 0.012 | negative |
| 376.008@5.046  | up | 1.50  | 0.001 | 0.012 | negative |
| 386.041@4.301  | up | 3.56  | 0.001 | 0.012 | negative |
| 492.396@5.042  | up | 3.35  | 0.001 | 0.012 | negative |
| 431.105@5.042  | up | 1.53  | 0.001 | 0.012 | negative |
| 420.336@2.339  | up | 17.11 | 0.001 | 0.012 | negative |
| 510.233@1.225  | up | 4.37  | 0.001 | 0.012 | negative |
| 530.198@1.419  | up | 6.40  | 0.001 | 0.012 | negative |
| 451.990@5.046  | up | 1.83  | 0.001 | 0.012 | negative |
| 504.167@7.031  | up | 2.00  | 0.001 | 0.012 | negative |
| 642.203@6.955  | up | 1.67  | 0.001 | 0.012 | negative |
| 476.215@2.809  | up | 4.94  | 0.001 | 0.012 | negative |
| 192.119@5.045  | up | 1.72  | 0.001 | 0.012 | negative |
| 419.973@7.156  | up | 1.51  | 0.001 | 0.012 | negative |
| 764.188@7.811  | up | 2.57  | 0.001 | 0.012 | negative |
| 617.177@1.422  | up | 2.56  | 0.001 | 0.012 | negative |
| 184.050@4.293  | up | 1.97  | 0.001 | 0.012 | negative |
| 141.948@10.350 | up | 16.89 | 0.001 | 0.012 | negative |
| 780.203@1.449  | up | 2.53  | 0.001 | 0.012 | negative |
| 633.186@7.035  | up | 2.44  | 0.001 | 0.012 | negative |
| 596.179@2.361  | up | 4.24  | 0.001 | 0.012 | negative |

|                      |      |      |       |       |          |
|----------------------|------|------|-------|-------|----------|
| <b>150.021@7.323</b> | down | 4.38 | 0.001 | 0.012 | negative |
| <b>795.160@1.430</b> | up   | 3.81 | 0.001 | 0.012 | negative |
| <b>258.131@1.961</b> | up   | 2.37 | 0.001 | 0.012 | negative |
| <b>828.275@8.413</b> | up   | 3.07 | 0.001 | 0.012 | negative |
| <b>267.221@1.367</b> | down | 1.26 | 0.002 | 0.016 | positive |
| <b>255.254@1.404</b> | down | 1.33 | 0.002 | 0.016 | positive |
| <b>653.283@3.085</b> | up   | 2.11 | 0.002 | 0.016 | positive |
| <b>574.706@9.701</b> | up   | 1.73 | 0.002 | 0.016 | positive |
| <b>562.834@1.379</b> | down | 1.55 | 0.002 | 0.016 | positive |
| <b>886.824@1.347</b> | down | 1.56 | 0.002 | 0.016 | positive |
| <b>550.538@1.403</b> | down | 1.72 | 0.002 | 0.016 | positive |
| <b>371.174@8.148</b> | up   | 2.87 | 0.002 | 0.016 | positive |
| <b>70.076@1.359</b>  | down | 1.37 | 0.002 | 0.016 | positive |
| <b>800.543@1.198</b> | up   | 1.65 | 0.002 | 0.016 | positive |
| <b>679.424@1.321</b> | up   | 1.27 | 0.002 | 0.016 | positive |
| <b>551.281@1.285</b> | up   | 1.97 | 0.002 | 0.016 | positive |
| <b>972.323@7.826</b> | up   | 3.06 | 0.002 | 0.016 | positive |
| <b>802.076@1.364</b> | down | 1.36 | 0.002 | 0.016 | positive |
| <b>727.444@1.300</b> | up   | 1.50 | 0.002 | 0.016 | positive |
| <b>459.226@7.870</b> | up   | 1.71 | 0.002 | 0.016 | positive |
| <b>242.022@6.421</b> | up   | 1.96 | 0.002 | 0.018 | negative |
| <b>534.110@6.421</b> | up   | 2.12 | 0.002 | 0.018 | negative |
| <b>246.009@7.121</b> | up   | 2.37 | 0.002 | 0.018 | negative |
| <b>524.092@1.410</b> | up   | 1.74 | 0.002 | 0.018 | negative |
| <b>478.069@5.049</b> | up   | 3.98 | 0.002 | 0.018 | negative |
| <b>250.219@1.350</b> | down | 1.33 | 0.003 | 0.021 | positive |
| <b>461.292@1.408</b> | up   | 1.38 | 0.003 | 0.021 | positive |
| <b>717.565@1.398</b> | down | 1.34 | 0.003 | 0.021 | positive |
| <b>232.216@1.356</b> | down | 1.23 | 0.003 | 0.021 | positive |
| <b>260.210@1.362</b> | down | 1.23 | 0.003 | 0.021 | positive |
| <b>153.108@1.392</b> | down | 1.38 | 0.003 | 0.021 | positive |
| <b>465.170@1.438</b> | up   | 1.71 | 0.003 | 0.021 | positive |
| <b>406.290@1.218</b> | down | 1.53 | 0.003 | 0.021 | positive |
| <b>521.198@7.040</b> | up   | 1.98 | 0.003 | 0.021 | positive |
| <b>283.173@1.832</b> | up   | 7.14 | 0.003 | 0.021 | positive |
| <b>665.662@1.360</b> | up   | 3.05 | 0.003 | 0.021 | positive |
| <b>557.309@8.349</b> | up   | 1.93 | 0.003 | 0.021 | positive |
| <b>835.103@1.346</b> | down | 1.31 | 0.003 | 0.021 | positive |
| <b>972.327@7.043</b> | up   | 2.69 | 0.003 | 0.021 | positive |
| <b>622.794@1.402</b> | down | 1.28 | 0.003 | 0.021 | positive |
| <b>154.006@3.792</b> | up   | 1.31 | 0.003 | 0.024 | negative |

|                       |      |       |       |       |          |
|-----------------------|------|-------|-------|-------|----------|
| <b>335.239@1.357</b>  | down | 1.27  | 0.003 | 0.024 | negative |
| <b>611.172@6.833</b>  | up   | 1.82  | 0.003 | 0.024 | negative |
| <b>104.044@2.228</b>  | up   | 1.31  | 0.003 | 0.024 | negative |
| <b>58.042@7.453</b>   | up   | 1.22  | 0.003 | 0.024 | negative |
| <b>321.212@1.368</b>  | up   | 2.89  | 0.003 | 0.024 | negative |
| <b>478.073@5.044</b>  | up   | 4.19  | 0.003 | 0.024 | negative |
| <b>482.181@1.290</b>  | up   | 2.02  | 0.003 | 0.024 | negative |
| <b>438.147@1.302</b>  | down | 1.65  | 0.003 | 0.024 | negative |
| <b>749.941@1.160</b>  | up   | 1.25  | 0.004 | 0.028 | positive |
| <b>344.079@2.194</b>  | down | 17.74 | 0.004 | 0.028 | positive |
| <b>327.199@2.027</b>  | up   | 14.61 | 0.004 | 0.028 | positive |
| <b>152.115@1.352</b>  | down | 1.36  | 0.004 | 0.028 | positive |
| <b>574.604@9.700</b>  | up   | 1.66  | 0.004 | 0.028 | positive |
| <b>213.161@1.398</b>  | down | 1.69  | 0.004 | 0.028 | positive |
| <b>118.064@5.030</b>  | up   | 1.61  | 0.004 | 0.028 | positive |
| <b>359.192@8.408</b>  | up   | 1.86  | 0.004 | 0.028 | positive |
| <b>463.073@10.792</b> | up   | 1.48  | 0.004 | 0.028 | positive |
| <b>274.187@1.393</b>  | down | 1.27  | 0.004 | 0.028 | positive |
| <b>448.144@1.438</b>  | up   | 1.66  | 0.004 | 0.028 | positive |
| <b>603.844@17.681</b> | down | 1.17  | 0.004 | 0.028 | positive |
| <b>118.026@1.376</b>  | down | 1.42  | 0.004 | 0.032 | negative |
| <b>236.051@1.376</b>  | down | 1.37  | 0.004 | 0.032 | negative |
| <b>464.101@10.288</b> | down | 1.63  | 0.004 | 0.032 | negative |
| <b>434.118@6.584</b>  | up   | 1.33  | 0.004 | 0.032 | negative |
| <b>612.175@1.435</b>  | up   | 1.95  | 0.004 | 0.032 | negative |
| <b>278.035@5.046</b>  | up   | 1.81  | 0.004 | 0.032 | negative |
| <b>617.173@1.417</b>  | up   | 2.04  | 0.004 | 0.032 | negative |
| <b>390.031@7.359</b>  | down | 4.37  | 0.005 | 0.043 | negative |
| <b>194.115@2.535</b>  | up   | 1.82  | 0.005 | 0.036 | positive |
| <b>156.159@24.812</b> | up   | 1.62  | 0.005 | 0.036 | positive |
| <b>150.088@2.295</b>  | up   | 1.75  | 0.005 | 0.036 | positive |
| <b>250.975@1.161</b>  | up   | 1.22  | 0.005 | 0.036 | positive |
| <b>386.970@1.279</b>  | up   | 2.56  | 0.005 | 0.036 | positive |
| <b>774.844@1.278</b>  | up   | 1.80  | 0.005 | 0.036 | positive |
| <b>422.287@2.533</b>  | up   | 1.72  | 0.005 | 0.036 | positive |
| <b>141.147@9.405</b>  | up   | 1.49  | 0.005 | 0.036 | positive |
| <b>241.219@1.382</b>  | down | 1.36  | 0.005 | 0.036 | positive |
| <b>582.704@2.535</b>  | up   | 1.76  | 0.005 | 0.036 | positive |
| <b>612.477@1.440</b>  | down | 1.41  | 0.005 | 0.036 | positive |
| <b>116.061@1.626</b>  | up   | 2.42  | 0.005 | 0.036 | positive |
| <b>618.595@1.554</b>  | down | 2.74  | 0.005 | 0.036 | positive |

|                      |      |      |       |       |          |
|----------------------|------|------|-------|-------|----------|
| <b>78.047@1.374</b>  | down | 1.51 | 0.005 | 0.036 | positive |
| <b>150.135@1.369</b> | down | 1.34 | 0.005 | 0.036 | positive |
| <b>515.301@5.145</b> | up   | 5.91 | 0.005 | 0.036 | positive |
| <b>90.030@7.680</b>  | up   | 1.15 | 0.005 | 0.043 | negative |
| <b>419.152@5.090</b> | up   | 1.37 | 0.005 | 0.043 | negative |
| <b>500.174@1.273</b> | up   | 3.96 | 0.005 | 0.043 | negative |
| <b>512.858@1.421</b> | down | 1.41 | 0.005 | 0.043 | negative |
| <b>523.049@6.882</b> | up   | 1.15 | 0.005 | 0.043 | negative |
| <b>773.224@7.256</b> | up   | 2.02 | 0.005 | 0.043 | negative |
| <b>511.103@9.165</b> | up   | 1.34 | 0.005 | 0.043 | negative |
| <b>619.090@7.472</b> | up   | 2.33 | 0.005 | 0.043 | negative |
| <b>238.142@2.995</b> | up   | 1.87 | 0.008 | 0.048 | positive |
| <b>293.219@1.416</b> | down | 1.21 | 0.008 | 0.048 | positive |
| <b>277.234@1.439</b> | down | 1.18 | 0.008 | 0.048 | positive |
| <b>88.053@2.530</b>  | up   | 1.98 | 0.008 | 0.048 | positive |
| <b>311.245@1.415</b> | down | 1.19 | 0.008 | 0.048 | positive |
| <b>817.417@1.268</b> | up   | 1.94 | 0.008 | 0.048 | positive |
| <b>82.044@1.285</b>  | up   | 1.59 | 0.008 | 0.048 | positive |
| <b>269.158@7.136</b> | up   | 2.87 | 0.008 | 0.048 | positive |
| <b>714.828@2.990</b> | up   | 2.05 | 0.008 | 0.048 | positive |
| <b>626.818@1.407</b> | down | 1.21 | 0.008 | 0.048 | positive |
| <b>443.326@1.386</b> | down | 1.79 | 0.008 | 0.048 | positive |
| <b>765.915@2.993</b> | up   | 2.77 | 0.008 | 0.048 | positive |

**Supplementary Table 2. Differentially expressed untargeted metabolites from the PVC of APOE3 vs. E4 mice**

| <b>Mass (Da) @ Retention Time (min)</b> | <b>Regulation in E4/4</b> | <b>Fold Change</b> | <b>p-value</b> | <b>FDR</b> | <b>Detection Mode</b> |
|-----------------------------------------|---------------------------|--------------------|----------------|------------|-----------------------|
| 386.186@1.277                           | up                        | 3.11               | 0.001          | 0.014      | positive              |
| 191.151@9.700                           | up                        | 1.51               | 0.001          | 0.014      | positive              |
| 403.209@1.277                           | up                        | 2.64               | 0.001          | 0.014      | positive              |
| 772.707@1.277                           | up                        | 3.55               | 0.001          | 0.014      | positive              |
| 279.254@1.379                           | down                      | 1.37               | 0.001          | 0.014      | positive              |
| 789.398@1.275                           | up                        | 6.08               | 0.001          | 0.014      | positive              |
| 173.140@9.690                           | up                        | 1.64               | 0.001          | 0.014      | positive              |
| 281.270@1.379                           | down                      | 1.43               | 0.001          | 0.014      | positive              |
| 681.437@1.328                           | up                        | 2.29               | 0.001          | 0.014      | positive              |
| 330.121@1.276                           | up                        | 2.60               | 0.001          | 0.014      | positive              |
| 667.456@1.355                           | up                        | 2.10               | 0.001          | 0.014      | positive              |
| 665.441@1.363                           | up                        | 2.15               | 0.001          | 0.014      | positive              |
| 297.264@1.344                           | down                      | 1.30               | 0.001          | 0.014      | positive              |
| 387.356@1.276                           | up                        | 3.69               | 0.001          | 0.014      | positive              |
| 683.449@1.329                           | up                        | 2.02               | 0.001          | 0.014      | positive              |
| 97.088@9.700                            | up                        | 1.51               | 0.001          | 0.014      | positive              |
| 472.270@1.247                           | up                        | 20.46              | 0.001          | 0.014      | positive              |
| 810.327@1.275                           | up                        | 5.15               | 0.001          | 0.014      | positive              |
| 472.280@1.211                           | down                      | 12.38              | 0.001          | 0.014      | positive              |
| 255.254@1.404                           | down                      | 1.27               | 0.001          | 0.014      | positive              |
| 136.073@2.354                           | up                        | 2.90               | 0.001          | 0.014      | positive              |
| 508.230@2.083                           | up                        | 3.89               | 0.001          | 0.014      | positive              |
| 386.779@1.279                           | up                        | 4.48               | 0.001          | 0.014      | positive              |
| 467.184@1.436                           | up                        | 2.81               | 0.001          | 0.014      | positive              |
| 424.141@1.280                           | up                        | 2.13               | 0.001          | 0.014      | positive              |
| 701.462@1.432                           | up                        | 3.64               | 0.001          | 0.014      | positive              |
| 174.008@1.273                           | up                        | 1.94               | 0.001          | 0.014      | positive              |
| 536.526@1.393                           | down                      | 1.59               | 0.001          | 0.014      | positive              |
| 251.224@1.397                           | down                      | 1.28               | 0.001          | 0.014      | positive              |
| 900.685@1.443                           | up                        | 8.45               | 0.001          | 0.014      | positive              |
| 155.130@9.692                           | up                        | 1.60               | 0.001          | 0.014      | positive              |
| 697.432@1.323                           | up                        | 2.17               | 0.001          | 0.014      | positive              |
| 180.019@1.418                           | up                        | 1.64               | 0.001          | 0.014      | positive              |
| 699.446@1.385                           | up                        | 2.57               | 0.001          | 0.014      | positive              |
| 574.210@9.700                           | up                        | 1.74               | 0.001          | 0.014      | positive              |



|               |      |       |       |       |          |
|---------------|------|-------|-------|-------|----------|
| 269.238@1.355 | down | 1.36  | 0.001 | 0.014 | positive |
| 580.217@1.283 | up   | 2.50  | 0.001 | 0.014 | positive |
| 250.975@1.161 | up   | 1.14  | 0.001 | 0.014 | positive |
| 667.457@1.355 | up   | 2.10  | 0.001 | 0.014 | positive |
| 574.318@9.703 | up   | 1.68  | 0.001 | 0.014 | positive |
| 900.690@1.443 | up   | 5.28  | 0.001 | 0.014 | positive |
| 772.944@1.276 | up   | 10.49 | 0.001 | 0.014 | positive |
| 506.475@1.386 | down | 1.51  | 0.001 | 0.014 | positive |
| 118.063@2.355 | up   | 2.75  | 0.001 | 0.014 | positive |
| 262.227@1.379 | down | 1.29  | 0.001 | 0.014 | positive |
| 403.381@1.274 | up   | 3.62  | 0.001 | 0.014 | positive |
| 789.631@1.270 | up   | 5.61  | 0.001 | 0.014 | positive |
| 246.221@9.299 | up   | 1.76  | 0.001 | 0.014 | positive |
| 683.271@2.120 | up   | 4.25  | 0.001 | 0.014 | positive |
| 560.518@1.380 | down | 1.96  | 0.001 | 0.014 | positive |
| 695.423@1.342 | up   | 1.72  | 0.001 | 0.014 | positive |
| 710.620@1.386 | down | 2.26  | 0.001 | 0.014 | positive |
| 776.853@1.271 | up   | 4.51  | 0.001 | 0.014 | positive |
| 655.428@1.334 | up   | 1.81  | 0.001 | 0.014 | positive |
| 990.823@1.282 | up   | 2.14  | 0.001 | 0.014 | positive |
| 574.706@9.701 | up   | 1.70  | 0.001 | 0.014 | positive |
| 990.829@1.282 | up   | 2.29  | 0.001 | 0.014 | positive |
| 576.823@9.699 | up   | 1.61  | 0.001 | 0.014 | positive |
| 277.222@9.631 | up   | 2.74  | 0.001 | 0.014 | positive |
| 566.508@1.426 | down | 1.53  | 0.001 | 0.014 | positive |
| 886.688@1.341 | down | 1.40  | 0.001 | 0.014 | positive |
| 854.355@1.441 | up   | 6.49  | 0.001 | 0.014 | positive |
| 858.465@1.285 | up   | 10.18 | 0.001 | 0.014 | positive |
| 562.834@1.379 | down | 1.54  | 0.001 | 0.014 | positive |
| 544.316@1.208 | up   | 2.70  | 0.001 | 0.014 | positive |
| 266.206@9.705 | up   | 2.65  | 0.001 | 0.014 | positive |
| 636.165@1.273 | up   | 2.09  | 0.001 | 0.014 | positive |
| 241.219@1.382 | down | 1.27  | 0.001 | 0.014 | positive |
| 774.084@1.278 | up   | 7.49  | 0.001 | 0.014 | positive |
| 508.493@1.369 | down | 2.10  | 0.001 | 0.014 | positive |
| 534.509@1.370 | down | 2.07  | 0.001 | 0.014 | positive |
| 655.422@1.333 | up   | 1.80  | 0.001 | 0.014 | positive |
| 917.339@1.443 | up   | 8.14  | 0.001 | 0.014 | positive |
| 789.735@1.279 | up   | 14.76 | 0.001 | 0.014 | positive |
| 723.519@1.621 | up   | 3.58  | 0.001 | 0.014 | positive |
| 576.958@9.702 | up   | 1.68  | 0.001 | 0.014 | positive |

|                       |      |       |       |       |          |
|-----------------------|------|-------|-------|-------|----------|
| <b>274.063@1.281</b>  | up   | 3.15  | 0.001 | 0.014 | positive |
| <b>800.543@1.198</b>  | up   | 1.72  | 0.001 | 0.014 | positive |
| <b>713.422@1.350</b>  | up   | 2.12  | 0.001 | 0.014 | positive |
| <b>729.425@1.402</b>  | up   | 2.37  | 0.001 | 0.014 | positive |
| <b>316.093@2.535</b>  | up   | 2.96  | 0.001 | 0.014 | positive |
| <b>679.424@1.321</b>  | up   | 1.38  | 0.001 | 0.014 | positive |
| <b>562.939@1.379</b>  | down | 1.69  | 0.001 | 0.014 | positive |
| <b>660.673@1.274</b>  | up   | 11.80 | 0.001 | 0.014 | positive |
| <b>442.254@1.200</b>  | up   | 3.63  | 0.001 | 0.014 | positive |
| <b>807.153@1.274</b>  | up   | 4.24  | 0.001 | 0.014 | positive |
| <b>934.369@1.435</b>  | up   | 3.52  | 0.001 | 0.014 | positive |
| <b>938.270@1.439</b>  | up   | 5.64  | 0.001 | 0.014 | positive |
| <b>681.748@1.321</b>  | up   | 3.15  | 0.001 | 0.014 | positive |
| <b>146.105@1.305</b>  | up   | 1.42  | 0.001 | 0.014 | positive |
| <b>797.387@1.282</b>  | up   | 13.54 | 0.001 | 0.014 | positive |
| <b>731.437@1.422</b>  | up   | 2.44  | 0.001 | 0.014 | positive |
| <b>403.447@1.275</b>  | up   | 3.55  | 0.001 | 0.014 | positive |
| <b>627.413@1.356</b>  | up   | 4.23  | 0.001 | 0.014 | positive |
| <b>429.395@7.778</b>  | up   | 3.77  | 0.001 | 0.014 | positive |
| <b>485.278@9.312</b>  | up   | 1.88  | 0.001 | 0.014 | positive |
| <b>745.417@1.429</b>  | up   | 2.29  | 0.001 | 0.014 | positive |
| <b>807.152@1.274</b>  | up   | 4.64  | 0.001 | 0.014 | positive |
| <b>203.114@13.469</b> | up   | 1.40  | 0.002 | 0.018 | positive |
| <b>742.247@1.458</b>  | up   | 2.34  | 0.002 | 0.018 | positive |
| <b>84.021@13.470</b>  | up   | 1.36  | 0.002 | 0.018 | positive |
| <b>261.192@9.629</b>  | up   | 1.49  | 0.002 | 0.018 | positive |
| <b>241.270@8.482</b>  | down | 9.41  | 0.002 | 0.018 | positive |
| <b>886.824@1.347</b>  | down | 1.31  | 0.002 | 0.018 | positive |
| <b>369.296@1.310</b>  | down | 1.97  | 0.002 | 0.018 | positive |
| <b>203.238@13.469</b> | up   | 1.48  | 0.002 | 0.018 | positive |
| <b>241.213@1.375</b>  | down | 1.33  | 0.002 | 0.018 | positive |
| <b>550.538@1.403</b>  | down | 1.39  | 0.002 | 0.018 | positive |
| <b>371.174@8.148</b>  | up   | 2.81  | 0.002 | 0.018 | positive |
| <b>592.920@1.348</b>  | down | 1.44  | 0.002 | 0.018 | positive |
| <b>118.064@5.030</b>  | up   | 2.10  | 0.002 | 0.018 | positive |
| <b>677.407@1.334</b>  | up   | 1.94  | 0.002 | 0.018 | positive |
| <b>835.103@1.346</b>  | down | 1.26  | 0.002 | 0.018 | positive |
| <b>684.237@1.451</b>  | up   | 2.80  | 0.002 | 0.018 | positive |
| <b>609.848@13.474</b> | up   | 1.53  | 0.002 | 0.018 | positive |
| <b>295.251@1.347</b>  | down | 1.22  | 0.003 | 0.023 | positive |
| <b>311.245@1.402</b>  | down | 1.15  | 0.003 | 0.023 | positive |

|                       |      |       |       |       |          |
|-----------------------|------|-------|-------|-------|----------|
| <b>200.046@5.028</b>  | up   | 2.27  | 0.003 | 0.023 | positive |
| <b>250.219@1.350</b>  | down | 1.18  | 0.003 | 0.023 | positive |
| <b>243.186@9.691</b>  | up   | 1.16  | 0.003 | 0.023 | positive |
| <b>312.274@8.872</b>  | down | 1.26  | 0.003 | 0.023 | positive |
| <b>575.489@1.357</b>  | up   | 1.22  | 0.003 | 0.023 | positive |
| <b>889.205@1.346</b>  | down | 1.27  | 0.003 | 0.023 | positive |
| <b>637.414@1.375</b>  | up   | 3.05  | 0.003 | 0.023 | positive |
| <b>82.044@1.285</b>   | up   | 2.03  | 0.003 | 0.023 | positive |
| <b>144.043@13.472</b> | up   | 1.39  | 0.003 | 0.023 | positive |
| <b>335.222@1.371</b>  | down | 1.55  | 0.003 | 0.023 | positive |
| <b>731.430@1.422</b>  | up   | 1.87  | 0.003 | 0.023 | positive |
| <b>665.662@1.360</b>  | up   | 2.73  | 0.003 | 0.023 | positive |
| <b>557.309@8.349</b>  | up   | 2.01  | 0.003 | 0.023 | positive |
| <b>627.415@1.363</b>  | up   | 3.49  | 0.003 | 0.023 | positive |
| <b>422.163@1.266</b>  | up   | 3.31  | 0.001 | 0.026 | negative |
| <b>424.161@1.266</b>  | up   | 3.50  | 0.001 | 0.026 | negative |
| <b>446.206@1.268</b>  | up   | 4.12  | 0.001 | 0.026 | negative |
| <b>450.158@1.415</b>  | up   | 2.73  | 0.001 | 0.026 | negative |
| <b>424.336@1.266</b>  | up   | 4.79  | 0.001 | 0.026 | negative |
| <b>449.181@1.261</b>  | up   | 3.06  | 0.001 | 0.026 | negative |
| <b>446.206@1.262</b>  | up   | 4.46  | 0.001 | 0.026 | negative |
| <b>422.783@1.268</b>  | up   | 7.22  | 0.001 | 0.026 | negative |
| <b>422.730@1.268</b>  | up   | 5.75  | 0.001 | 0.026 | negative |
| <b>642.183@1.464</b>  | up   | 4.91  | 0.001 | 0.026 | negative |
| <b>450.338@1.416</b>  | up   | 3.42  | 0.001 | 0.026 | negative |
| <b>286.119@4.311</b>  | up   | 4.02  | 0.001 | 0.026 | negative |
| <b>416.028@10.351</b> | up   | 3.24  | 0.001 | 0.026 | negative |
| <b>374.073@10.325</b> | up   | 3.76  | 0.001 | 0.026 | negative |
| <b>356.174@1.269</b>  | up   | 4.59  | 0.001 | 0.026 | negative |
| <b>424.780@1.260</b>  | up   | 6.11  | 0.001 | 0.026 | negative |
| <b>434.038@10.351</b> | up   | 3.60  | 0.001 | 0.026 | negative |
| <b>850.822@1.268</b>  | up   | 7.68  | 0.001 | 0.026 | negative |
| <b>235.997@2.353</b>  | up   | 4.04  | 0.001 | 0.026 | negative |
| <b>426.167@1.265</b>  | up   | 3.61  | 0.001 | 0.026 | negative |
| <b>468.169@4.330</b>  | up   | 1.90  | 0.001 | 0.026 | negative |
| <b>450.410@1.416</b>  | up   | 4.53  | 0.001 | 0.026 | negative |
| <b>386.186@1.269</b>  | up   | 4.89  | 0.001 | 0.026 | negative |
| <b>432.198@1.265</b>  | up   | 11.42 | 0.001 | 0.026 | negative |
| <b>500.174@1.273</b>  | up   | 4.45  | 0.001 | 0.026 | negative |
| <b>246.009@7.121</b>  | up   | 2.28  | 0.001 | 0.026 | negative |
| <b>479.888@10.357</b> | up   | 3.39  | 0.001 | 0.026 | negative |

|                |      |       |       |       |          |
|----------------|------|-------|-------|-------|----------|
| 898.728@1.261  | up   | 4.25  | 0.001 | 0.026 | negative |
| 460.091@4.301  | up   | 14.40 | 0.001 | 0.026 | negative |
| 386.041@4.301  | up   | 3.49  | 0.001 | 0.026 | negative |
| 478.073@5.044  | up   | 6.00  | 0.001 | 0.026 | negative |
| 510.233@1.225  | up   | 4.11  | 0.001 | 0.026 | negative |
| 210.004@3.861  | down | 3.46  | 0.001 | 0.026 | negative |
| 476.215@2.809  | up   | 5.05  | 0.001 | 0.026 | negative |
| 305.992@3.872  | down | 2.58  | 0.001 | 0.026 | negative |
| 780.203@1.449  | up   | 3.19  | 0.001 | 0.026 | negative |
| 466.138@7.514  | up   | 4.02  | 0.001 | 0.026 | negative |
| 498.171@1.246  | up   | 3.58  | 0.001 | 0.026 | negative |
| 478.069@5.049  | up   | 4.88  | 0.001 | 0.026 | negative |
| 530.090@5.032  | up   | 2.26  | 0.001 | 0.026 | negative |
| 795.160@1.430  | up   | 3.44  | 0.001 | 0.026 | negative |
| 374.010@5.049  | up   | 1.72  | 0.002 | 0.027 | negative |
| 110.998@2.919  | down | 1.53  | 0.002 | 0.027 | negative |
| 556.106@7.113  | up   | 2.03  | 0.002 | 0.027 | negative |
| 403.089@2.912  | down | 1.56  | 0.002 | 0.027 | negative |
| 191.917@7.124  | up   | 1.93  | 0.002 | 0.027 | negative |
| 318.104@6.006  | up   | 2.95  | 0.002 | 0.027 | negative |
| 445.102@1.444  | down | 5.15  | 0.002 | 0.027 | negative |
| 614.181@1.414  | up   | 2.28  | 0.002 | 0.027 | negative |
| 610.197@6.008  | up   | 7.49  | 0.002 | 0.027 | negative |
| 58.042@7.453   | up   | 1.31  | 0.002 | 0.027 | negative |
| 596.221@1.432  | up   | 3.11  | 0.002 | 0.027 | negative |
| 492.135@5.042  | up   | 1.93  | 0.002 | 0.027 | negative |
| 614.182@1.414  | up   | 2.29  | 0.002 | 0.027 | negative |
| 388.099@5.039  | up   | 1.78  | 0.002 | 0.027 | negative |
| 382.075@7.279  | up   | 2.50  | 0.002 | 0.027 | negative |
| 514.127@4.986  | up   | 2.70  | 0.002 | 0.027 | negative |
| 451.990@5.046  | up   | 1.96  | 0.002 | 0.027 | negative |
| 524.092@1.410  | up   | 1.92  | 0.002 | 0.027 | negative |
| 184.050@4.293  | up   | 2.75  | 0.002 | 0.027 | negative |
| 258.131@1.961  | up   | 1.95  | 0.002 | 0.027 | negative |
| 200.044@5.046  | up   | 1.99  | 0.003 | 0.030 | negative |
| 492.135@5.046  | up   | 1.95  | 0.003 | 0.030 | negative |
| 742.247@1.458  | up   | 1.88  | 0.003 | 0.030 | negative |
| 88.015@2.780   | up   | 2.43  | 0.003 | 0.030 | negative |
| 191.916@5.047  | up   | 1.96  | 0.003 | 0.030 | negative |
| 413.833@17.826 | up   | 1.05  | 0.003 | 0.030 | negative |
| 334.046@10.373 | up   | 3.07  | 0.003 | 0.030 | negative |

|                       |      |       |       |       |          |
|-----------------------|------|-------|-------|-------|----------|
| <b>112.015@1.554</b>  | up   | 2.45  | 0.003 | 0.030 | negative |
| <b>200.168@5.048</b>  | up   | 1.99  | 0.003 | 0.030 | negative |
| <b>106.026@3.856</b>  | down | 2.55  | 0.003 | 0.030 | negative |
| <b>386.068@2.750</b>  | up   | 19.03 | 0.003 | 0.030 | negative |
| <b>304.018@5.064</b>  | up   | 1.79  | 0.003 | 0.030 | negative |
| <b>594.088@4.925</b>  | up   | 1.69  | 0.003 | 0.030 | negative |
| <b>218.013@2.383</b>  | up   | 2.12  | 0.003 | 0.030 | negative |
| <b>431.105@5.042</b>  | up   | 1.77  | 0.003 | 0.030 | negative |
| <b>419.973@7.156</b>  | up   | 1.77  | 0.003 | 0.030 | negative |
| <b>629.473@1.341</b>  | down | 1.39  | 0.003 | 0.030 | negative |
| <b>278.035@5.046</b>  | up   | 2.70  | 0.003 | 0.030 | negative |
| <b>315.277@1.439</b>  | down | 1.10  | 0.004 | 0.031 | positive |
| <b>431.232@1.255</b>  | down | 1.72  | 0.004 | 0.031 | positive |
| <b>414.204@1.258</b>  | down | 1.78  | 0.004 | 0.031 | positive |
| <b>556.448@1.344</b>  | down | 1.18  | 0.004 | 0.031 | positive |
| <b>574.604@9.700</b>  | up   | 1.73  | 0.004 | 0.031 | positive |
| <b>774.844@1.278</b>  | up   | 2.39  | 0.004 | 0.031 | positive |
| <b>265.227@1.385</b>  | down | 1.45  | 0.004 | 0.031 | positive |
| <b>134.075@1.259</b>  | down | 1.42  | 0.004 | 0.031 | positive |
| <b>307.198@9.729</b>  | up   | 1.50  | 0.004 | 0.031 | positive |
| <b>465.170@1.438</b>  | up   | 1.31  | 0.004 | 0.031 | positive |
| <b>216.110@10.420</b> | down | 1.39  | 0.004 | 0.031 | positive |
| <b>183.155@1.382</b>  | down | 1.59  | 0.004 | 0.031 | positive |
| <b>462.476@1.131</b>  | down | 1.16  | 0.004 | 0.031 | positive |
| <b>264.014@7.119</b>  | up   | 1.95  | 0.004 | 0.039 | negative |
| <b>514.093@1.270</b>  | up   | 2.38  | 0.004 | 0.039 | negative |
| <b>509.820@17.860</b> | up   | 1.05  | 0.004 | 0.039 | negative |
| <b>333.238@1.351</b>  | down | 1.21  | 0.004 | 0.039 | negative |
| <b>200.044@7.119</b>  | up   | 1.87  | 0.004 | 0.039 | negative |
| <b>341.995@7.123</b>  | up   | 1.81  | 0.004 | 0.039 | negative |
| <b>272.001@1.128</b>  | down | 1.07  | 0.004 | 0.039 | negative |
| <b>500.121@5.060</b>  | up   | 1.64  | 0.004 | 0.039 | negative |
| <b>596.108@5.056</b>  | up   | 1.95  | 0.004 | 0.039 | negative |
| <b>376.008@5.046</b>  | up   | 1.68  | 0.004 | 0.039 | negative |
| <b>398.996@8.771</b>  | down | 1.17  | 0.004 | 0.039 | negative |
| <b>582.407@1.339</b>  | down | 1.36  | 0.005 | 0.041 | positive |
| <b>280.137@1.253</b>  | down | 1.77  | 0.005 | 0.041 | positive |
| <b>488.113@1.435</b>  | up   | 1.80  | 0.005 | 0.041 | positive |
| <b>532.242@9.096</b>  | up   | 1.07  | 0.005 | 0.041 | positive |
| <b>375.256@9.354</b>  | up   | 1.18  | 0.005 | 0.041 | positive |
| <b>231.143@11.714</b> | up   | 1.26  | 0.005 | 0.041 | positive |

|                      |      |       |       |       |          |
|----------------------|------|-------|-------|-------|----------|
| <b>117.040@8.488</b> | down | 1.29  | 0.005 | 0.041 | positive |
| <b>90.047@1.263</b>  | down | 2.69  | 0.005 | 0.041 | positive |
| <b>150.135@1.369</b> | down | 1.33  | 0.005 | 0.041 | positive |
| <b>700.137@1.418</b> | up   | 1.67  | 0.005 | 0.041 | positive |
| <b>176.031@2.785</b> | up   | 39.98 | 0.005 | 0.046 | negative |
| <b>684.009@1.538</b> | up   | 62.14 | 0.005 | 0.046 | negative |
| <b>404.196@1.422</b> | up   | 2.57  | 0.005 | 0.046 | negative |
| <b>100.015@1.534</b> | up   | 1.80  | 0.005 | 0.046 | negative |
| <b>210.037@1.998</b> | up   | 2.09  | 0.005 | 0.046 | negative |
| <b>275.956@2.798</b> | up   | 21.38 | 0.005 | 0.046 | negative |
| <b>419.152@5.090</b> | up   | 1.90  | 0.005 | 0.046 | negative |
| <b>726.066@1.393</b> | up   | 6.12  | 0.005 | 0.046 | negative |
| <b>257.946@2.783</b> | up   | 16.93 | 0.005 | 0.046 | negative |
| <b>271.986@2.887</b> | down | 1.59  | 0.005 | 0.046 | negative |
| <b>364.982@2.818</b> | up   | 12.87 | 0.005 | 0.046 | negative |
| <b>586.201@1.249</b> | up   | 2.15  | 0.005 | 0.046 | negative |
| <b>726.063@1.393</b> | up   | 6.03  | 0.005 | 0.046 | negative |
| <b>337.993@4.729</b> | down | 1.50  | 0.005 | 0.046 | negative |
| <b>530.198@1.419</b> | up   | 4.61  | 0.005 | 0.046 | negative |
| <b>642.203@6.955</b> | up   | 1.91  | 0.005 | 0.046 | negative |
| <b>482.181@1.290</b> | up   | 2.47  | 0.005 | 0.046 | negative |
| <b>630.182@1.478</b> | up   | 3.10  | 0.005 | 0.046 | negative |
| <b>618.325@4.233</b> | up   | 4.49  | 0.005 | 0.046 | negative |
